# Supplementary material for: Affordable Magnetic Hydrogels Prepared from Biocompatible and Biodegradable Sources
Source: MDPI journal article supplement (doi:10.3390/polym13111693), 2021-05-22
Supplement: s1 [file s1]

Article

# Affordable Magnetic Hydrogels Prepared from Biocompatible and Biodegradable Sources

Raluca Ioana Baron <sup>1</sup>, Gabriela Biliuta <sup>1,\*</sup>, Vlad Socoliuc <sup>2,3</sup> and Sergiu Coseri <sup>1,\*</sup>

<sup>1</sup> “Petru Poni” Institute of Macromolecular Chemistry, Romanian Academy, 41 A, Gr. Ghica Voda Alley, 700487 Iasi, Romania; baron.raluca@icmpp.ro

<sup>2</sup> Romanian Academy – Timisoara Branch, Center for Fundamental and Advanced Technical Research, Laboratory of Magnetic Fluids, Mihai Viteazul Ave. 24, 300223 Timisoara, Romania; vsocoliuc@gmail.com

<sup>3</sup> Politehnica University of Timisoara, Research Center for Complex Fluids Systems Engineering, Mihai Viteazul Ave. 1, 300222 Timisoara, Romania

\* Correspondence: biliuta.gabriela@icmpp.ro (G.B.); coseris@icmpp.ro (S.C.)

## Supplementary Information

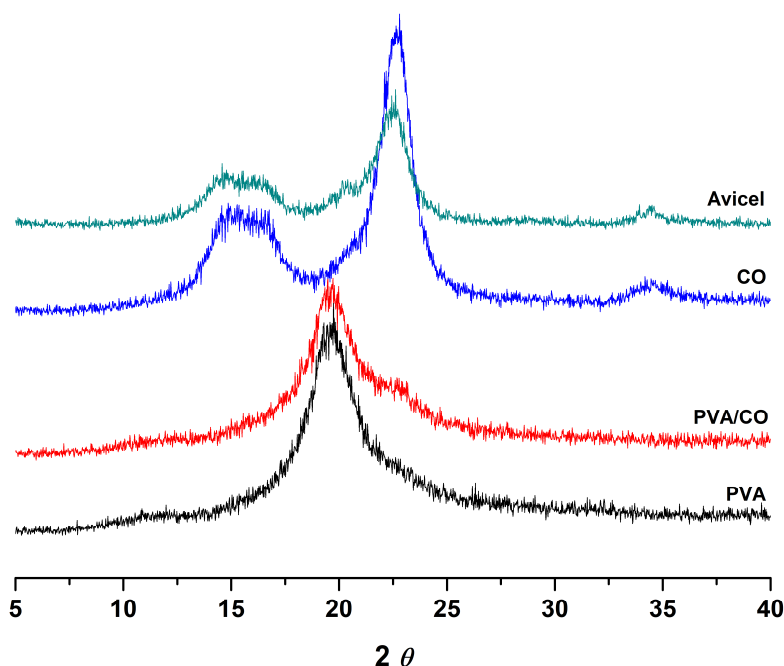

**Figure S1.** The XRD spectra of cellulose (Avicel), oxidized cellulose (CO), PVA, and the hybrid hydrogel sample (PVA/CO).

\* All these analyses were performed in the  $2\theta$  range between  $4^\circ$  to  $40^\circ$ , with a  $0.02^\circ \text{ s}^{-1}$  data acquisition, employing the reflection method.

**Citation:** Baron, R.I.; Biliuta, G.; Socoliuc, V.; Coseri, S. Affordable Magnetic Hydrogels Prepared from Biocompatible and Biodegradable Sources. *Polymers* **2021**, *13*, 1693. <https://doi.org/10.3390/polym13111693>

Academic Editor: Anton Blencowe

Received: 14 April 2021

Accepted: 13 May 2021

Published: date

**Publisher’s Note:** MDPI stays neutral with regard to jurisdictional claims in published maps and institutional affiliations.

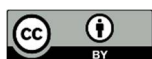

**Copyright:** © 2021 by the authors. Submitted for possible open access publication under the terms and conditions of the Creative Commons Attribution (CC BY) license (<http://creativecommons.org/licenses/by/4.0/>).

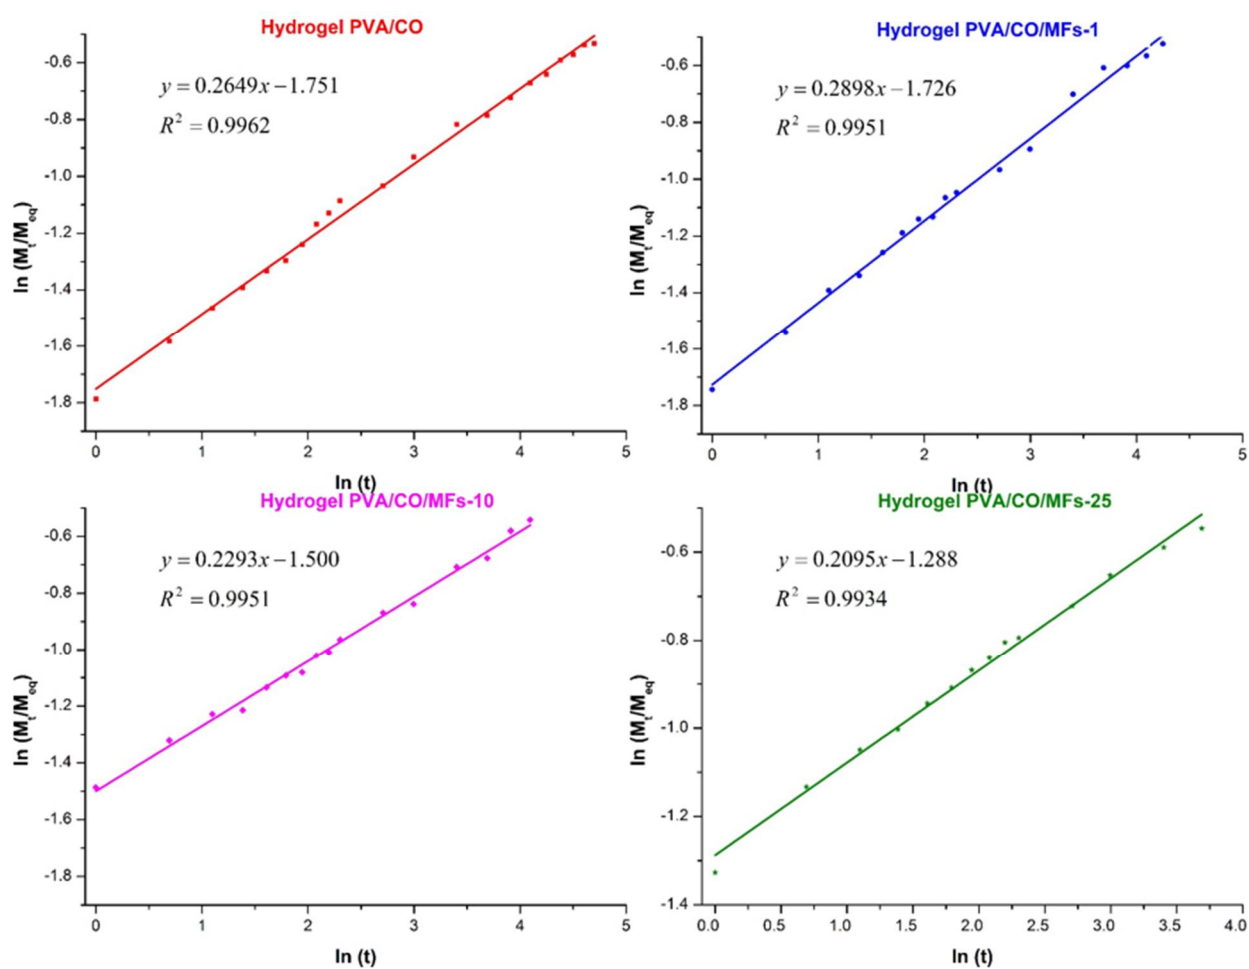

Figure S2. Swelling kinetic plots ( $\ln(M_t/M_{eq})$  versus  $\ln(t)$ ) of the hydrogels.
